# Supplementary material for: Genetic interactions between polycystin-1 and Wwtr1 in osteoblasts define a novel mechanosensing mechanism regulating bone formation in mice
Source: Bone Res. 2023 Oct 26;11:57. doi: 10.1038/s41413-023-00295-4 (PMC10603112; doi:10.1038/s41413-023-00295-4)
Supplement: Supplementary file 1 — Supplemental Material [file 41413_2023_295_MOESM1_ESM.pdf]

# Supplementary Information

Figure S1

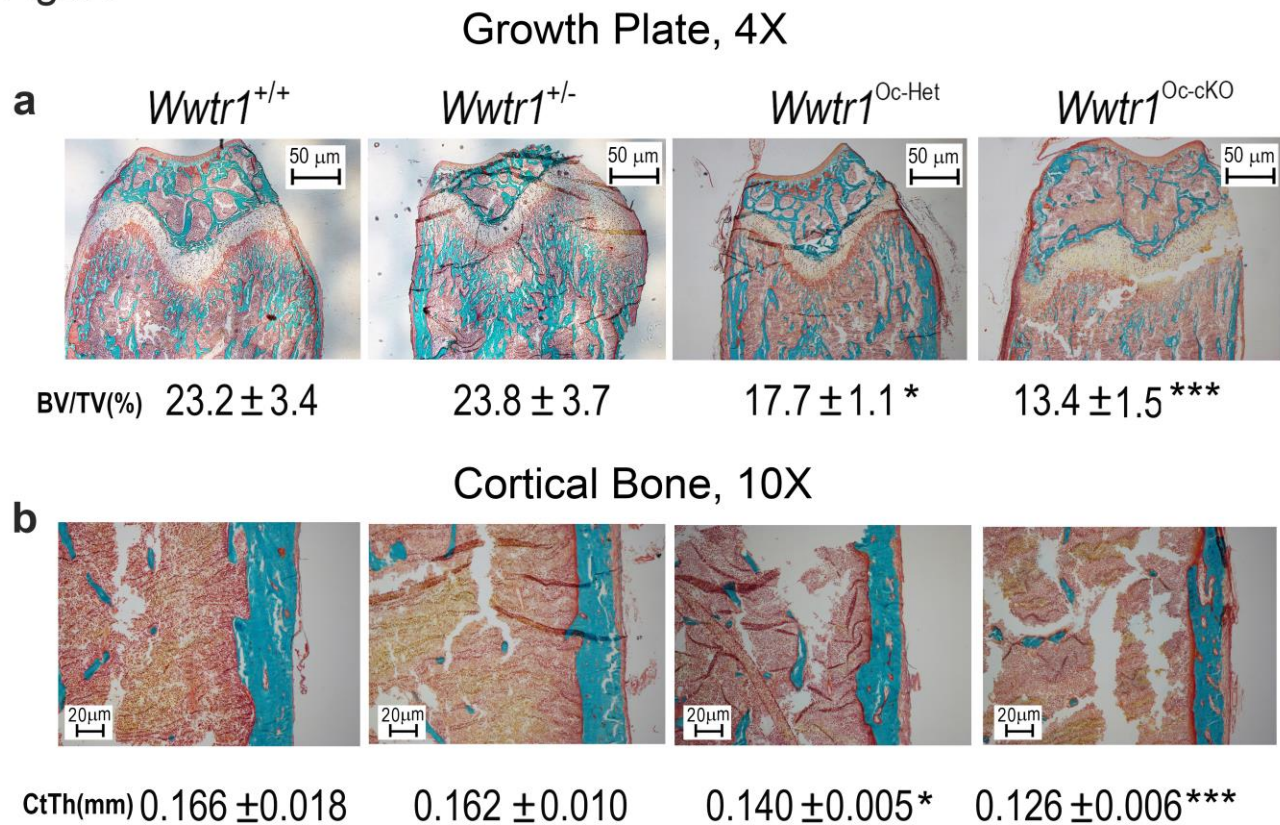

**Supplementary Figure S1. Histological analysis of conditional *Wwtr1* deletion in bone. (a & b)**

Goldner staining of non-decalcified bone. Representative images of distal femur sections displayed a gene-dosage dependent reduction in trabecular bone volume under growth plate **(a)** and cortical thickness in diaphyseal area **(b)** from 8-week-old conditional *Wwtr1* deleted mice compared with age-matched control mice. Data are expressed as the mean  $\pm$  S.D. from 6 individual mice (n=6). \**P* < 0.05, \*\**P* < 0.01, \*\*\**P* < 0.001 compared with *wild-type* control mice. *P* values were determined by 1-way ANOVA with Tukey's multiple-comparisons test.

Figure S2

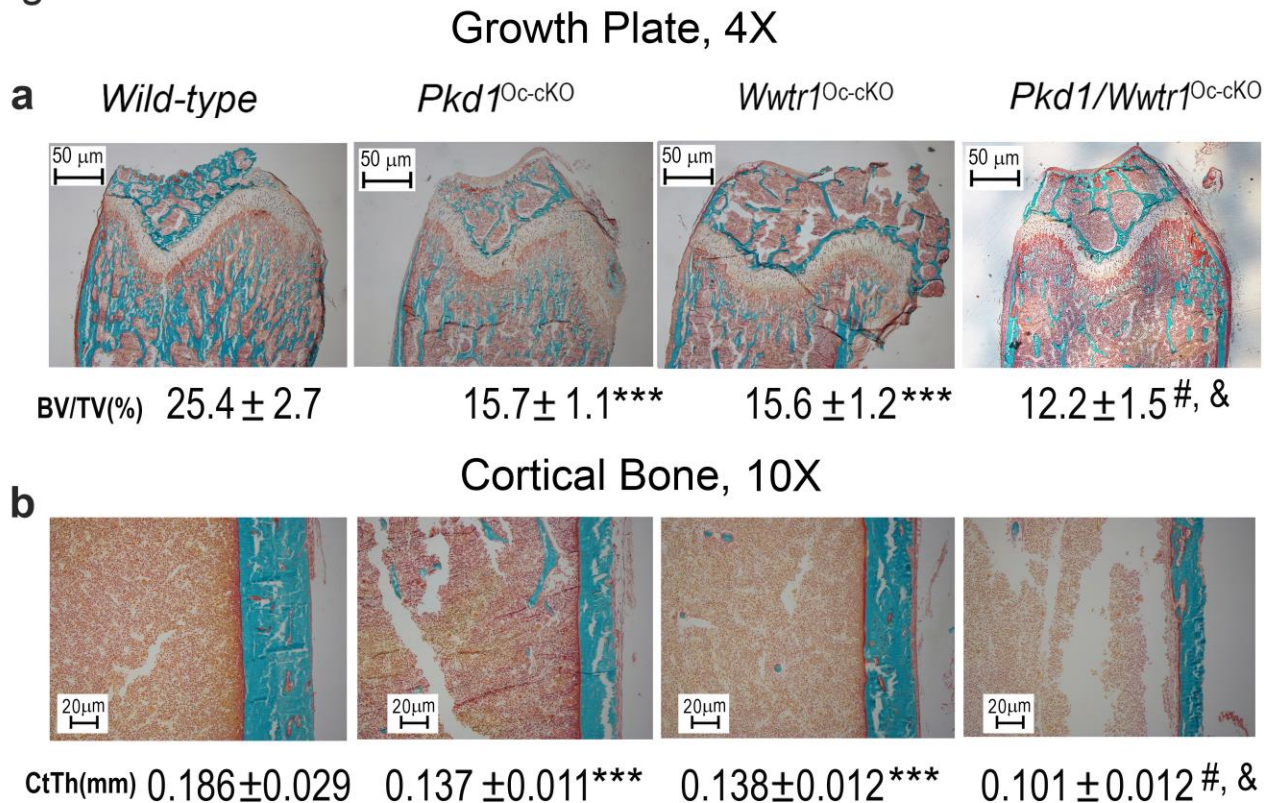

**Supplementary Figure S2. Histological analysis of conditional *Pkd1* and/or *Wwtr1* deletion in bone.** (a & b) Goldner staining of non-decalcified bone. Representative images of distal femur sections displayed significant reductions in trabecular bone volume under growth plate (a) and cortical thickness in diaphyseal area (b) from 8-week-old conditional *Pkd1* and/or *Wwtr1* deleted mice compared with age-matched control mice. Data are expressed as the mean  $\pm$  S.D. from serum samples of individual mice (n=6). \* $P < 0.05$ , \*\* $P < 0.01$ , \*\*\* $P < 0.001$  compared with *wild-type* mice, # $P < 0.05$ , ## $P < 0.01$ , ### $P < 0.001$  compared with *Wwtr1*<sup>Oc-cKO</sup> mice, and & $P < 0.05$ , && $P < 0.01$ , &&& $P < 0.001$  compared with *Pkd1*<sup>Oc-cKO</sup> mice, respectively.  $P$  values were determined by 1-way ANOVA with Tukey's multiple-comparisons test.
